# Supplementary material for: Dual-emission of silicon quantum dots modified by 9-ethylanthracene
Source: Royal Society of Chemistry journal article supplement (doi:10.1039/c3tc32318h), 2014-01-01
Supplement: c3tc32318h.pdf [file c3tc32318h.pdf]

Supporting Information

## Dual-Emission of Silicon Quantum Dots Modified by 9-Ethylanthracene

Guan Wang, Jianwei Ji, Xiangxing Xu\*

State Key Laboratory of Coordination Chemistry, School of Chemistry and Chemical Engineering,  
Nanjing National Laboratory of Microstructures, Nanjing University, Nanjing 210093, P. R. China.  
Email: xuxx@nju.edu.cn

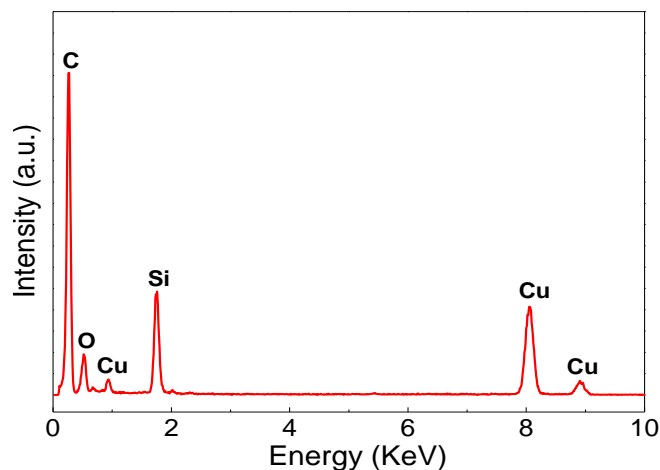

**Figure S1.** Energy dispersive X-ray spectroscopy (EDX) of 9-ea-Si QDs. The analysis indicates the presence of silicon, and the observation of O is due to limited surface oxidation in accordance with the IR spectrum. The containing of C can not be differentiated from the surface decyl groups and the supporting carbon film. The peaks of Cu are from the HRTEM sample grid.

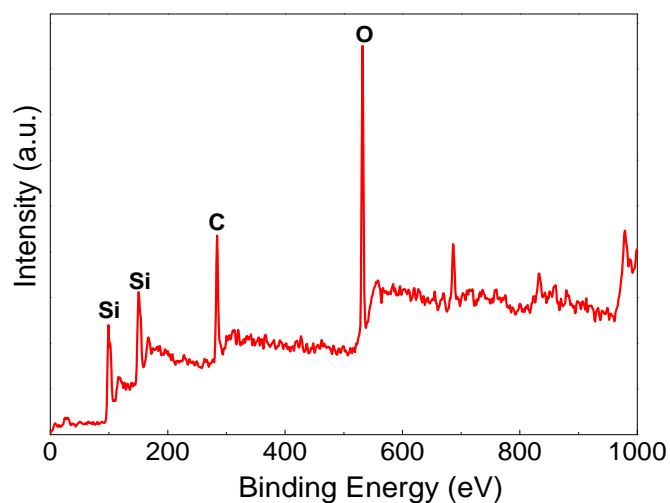

**Figure S2.** XPS survey spectrum of 9-ea-Si QDs.
